# Supplementary figures and images for: Pain management for the Nuss procedure: comparison between erector spinae plane block, thoracic epidural, and control
Source: HighWire-hosted journal article supplement (doi:10.1136/wjps-2022-000418), 2022-08-01

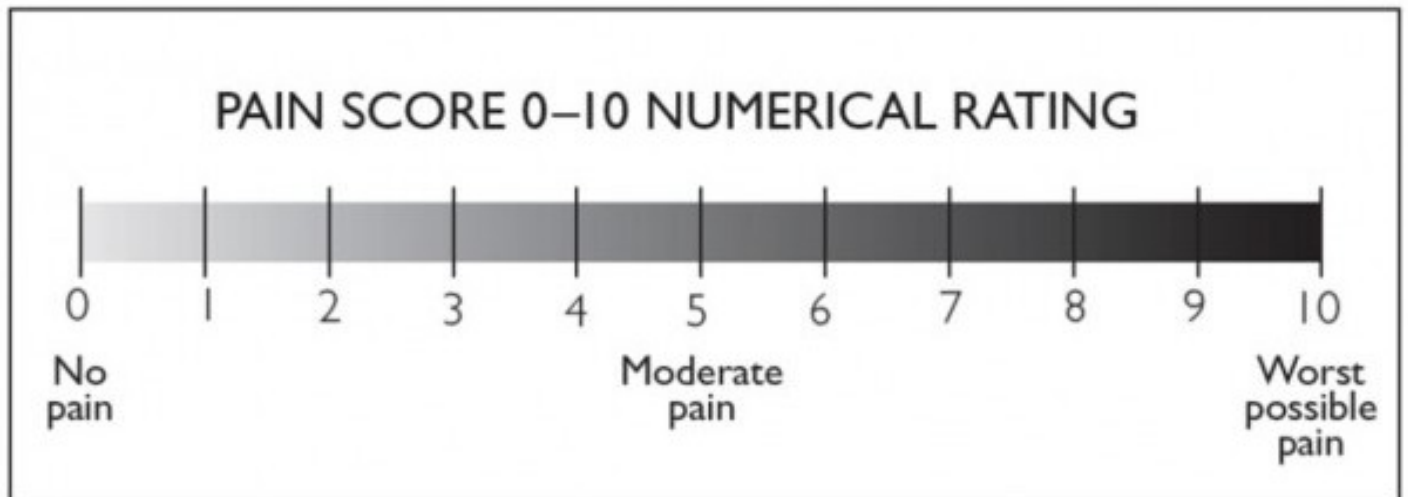

Supplement: wjps-2022-000418supp001_data_supplement.pdf [file wjps-2022-000418supp001_data_supplement.pdf]
